# Supplementary material for: Breaking through the Mermin-Wagner limit in 2D van der Waals magnets
Source: PubMed Central journal article supplement (PMC9663506; doi:10.1038/s41467-022-34389-0), 2022-11-14
Supplement: 41467_2022_34389_MOESM1_ESM.pdf [file 41467_2022_34389_MOESM1_ESM.pdf]

1 **Supplementary Information:**  
2 **Breaking through the Mermin-Wagner limit in 2D van der**  
3 **Waals magnets**

4 Sarah Jenkins<sup>1,2,3</sup>, Levente Rózsa<sup>4</sup>, Unai Atxitia<sup>5,6</sup>, Richard F. L. Evans<sup>1</sup>, Kostya S. Novoselov<sup>7</sup>  
5 Elton J. G. Santos<sup>8,9,10†</sup>

6 <sup>1</sup>*Department of Physics, University of York, York, YO10 5DD, UK*

7 <sup>2</sup>*TWIST Group, Institut für Physik, Johannes Gutenberg Universität, 55128 Mainz, Germany*

8 <sup>3</sup>*TWIST Group, Institut für Physik, Universität Duisburg-Essen, Campus Duisburg, 47057 Duis-*  
9 *burg, Germany*

10 <sup>4</sup>*Fachbereich Physik, Universität Konstanz, D-78457 Konstanz, Germany*

11 <sup>5</sup>*Dahlem Center for Complex Quantum Systems and Fachbereich Physik, Freie Universität Berlin,*  
12 *14195 Berlin, Germany*

13 <sup>6</sup>*Instituto de Ciencia de Materiales de Madrid, CSIC, Cantoblanco, 28049 Madrid, Spain*

14 <sup>7</sup>*Institute for Functional Intelligent Materials, National University of Singapore, 117544, Singa-*  
15 *pore*

16 <sup>8</sup>*Institute for Condensed Matter Physics and Complex Systems, School of Physics and Astronomy,*  
17 *The University of Edinburgh, EH9 3FD, United Kingdom*

18 <sup>9</sup>*Donostia International Physics Center (DIPC), 20018 Donostia-San Sebastián, Basque Country,*  
19 *Spain*

20 <sup>10</sup>*Higgs Centre for Theoretical Physics, The University of Edinburgh, EH9 3FD, United Kingdom*

21 <sup>†</sup>*Corresponding author: esantos@ed.ac.uk*

## 22 **Supplementary Section 1: Large-scale atomistic simulations**

The system is integrated using a Monte Carlo integrator to find the ground state. The Metropolis algorithm <sup>1</sup> takes a random spin with direction  $\mathbf{S}_i$ , and changes it to  $\mathbf{S}'_i$  - the trial spin direction. The next step is to calculate the change in energy between the initial and trial states  $\Delta E = E(\mathbf{S}'_i) - E(\mathbf{S}_i)$ . The new trial direction is then either accepted or rejected based on a probability ( $P$ ):

$$P = \exp\left(-\frac{\Delta E}{k_B T}\right), \quad (1)$$

23 where  $k_B$  is the Boltzmann constant and  $T$  is the absolute temperature. If the change in energy is  
24 less than zero then the spin is automatically accepted. This is repeated  $N$  times per Monte Carlo  
25 step where  $N$  is the number of atoms in the system.

26 The trial spin positions are selected using a sampling method<sup>2</sup> with three types of trial move:  
27 spin flip, Gaussian and random. The three types of trial moves allow the system to equilibrate  
28 quickly at any temperature. At high temperatures the random and spin flip sampling steps allow  
29 large changes in the spin direction and at low temperatures the Gaussian sampling creates small  
30 changes in the spin direction. The data files generated in this research can be found at the following  
31 repository link.

## 32 **Supplementary Section 2: Time-intensive computational simulations**

33 The simulations were run on the EPSRC Tier-2 National HPC CIRRUS (project ec131) and the UK  
34 National Supercomputer ARCHER2 (project d429). The largest 1000 nm  $\times$  1000 nm simulations

35 comprised over 8 million atoms. To fully equilibrate the systems, large number of Monte Carlo  
36 steps are required. We have used atomistic methods<sup>3,4</sup> with large parallelisation features to over  
37 6000 CPU cores. For a single temperature point on the magnetisation vs temperature curves a  
38 simulation of 40 million Monte Carlo steps was performed. For the largest systems, 432 CPU  
39 cores of CIRRUS/ARCHER2 were used and converged on an average of 30 hours. This is nearly  
40 113,000 hours of simulation time per point on the plots and each snapshot in Fig. 4 in the main  
41 text.

### 42 **Supplementary Section 3: Size effects and anisotropy**

43 The intrinsic magnetisation was simulated as a function of temperature with ( $K = 1 \times 10^{-24}$  J/atom)  
44 and without ( $K = 0$ ) anisotropy for a flake size of  $100 \times 100$  nm<sup>2</sup> (Supplementary Figure 1). The  
45 data show that there is a smaller change in the crossover temperature than for the  $1000 \times 1000$  nm<sup>2</sup>  
46 flake size (Fig. 1b) when fitted by Eq. (3) in the main text. The lack of anisotropy decreases the  
47 exponent: without anisotropy the fitting parameters are  $\beta = 0.53 \pm 0.03$  and  $T_x = 26.64 \pm 0.31$  K  
48 and with anisotropy  $\beta = 0.47 \pm 0.02$  and  $T_x = 27.14 \pm 0.27$  K.

### 49 **Supplementary Section 4: The choice of Monte Carlo trial moves and dipolar interactions**

50 We have used a Monte Carlo algorithm which chooses the new trial positions uniformly over the  
51 three possible trial moves<sup>5</sup>. Here we compare the results to an adaptive algorithm<sup>6</sup>, which adapts  
52 the choice of trial move to the simulation to improve the acceptance probability. Both simulations  
53 show the same magnetisation vs. temperature profile with the same crossover temperature (Sup-

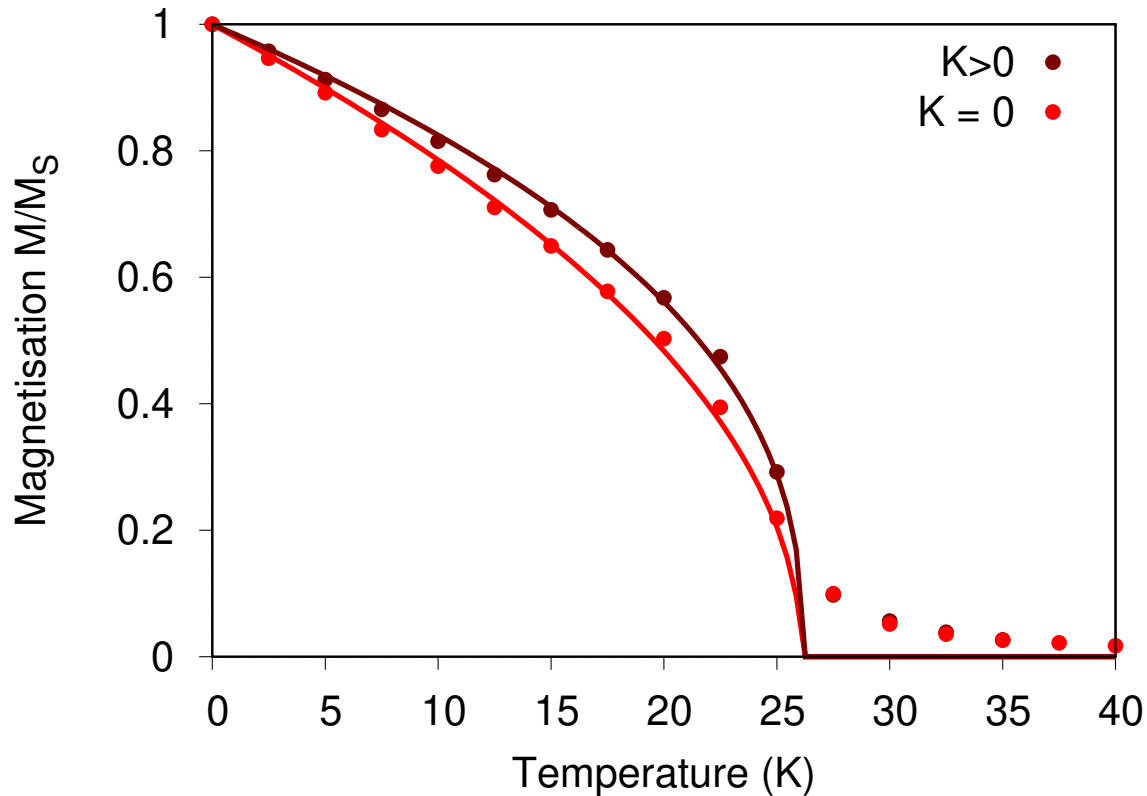

Supplementary Figure 1: **The effect of anisotropy for a flake size of  $100 \times 100 \text{ nm}^2$ .** See the caption of Figure 1b for the simulation parameters.

54plementary Fig. 2a-b). However, the adaptive algorithm converges approximately 10 times faster.  
 55 In the simulations in the paper we have started the system in a fully ordered state. In Supplemen-  
 56 tary Fig. 2c we show that the magnetisation vs. temperature curves are the same for both the fully  
 57 ordered and the fully disordered initial states and in Supplementary Fig. 2d we show the ordering  
 58 process at  $T = 10 \text{ K}$  starting from random and ordered magnetic states. The ordering process from  
 59 the disordered state is slow due to the large size of the system, taking around  $30 \times 10^6$  Monte Carlo  
 60 steps to reach thermal equilibrium, but exhibits a stable average magnetisation length for the last  
 61  $10 \times 10^6$  Monte Carlo steps. For the final  $10^6$  steps, the average magnetisation is the same as that

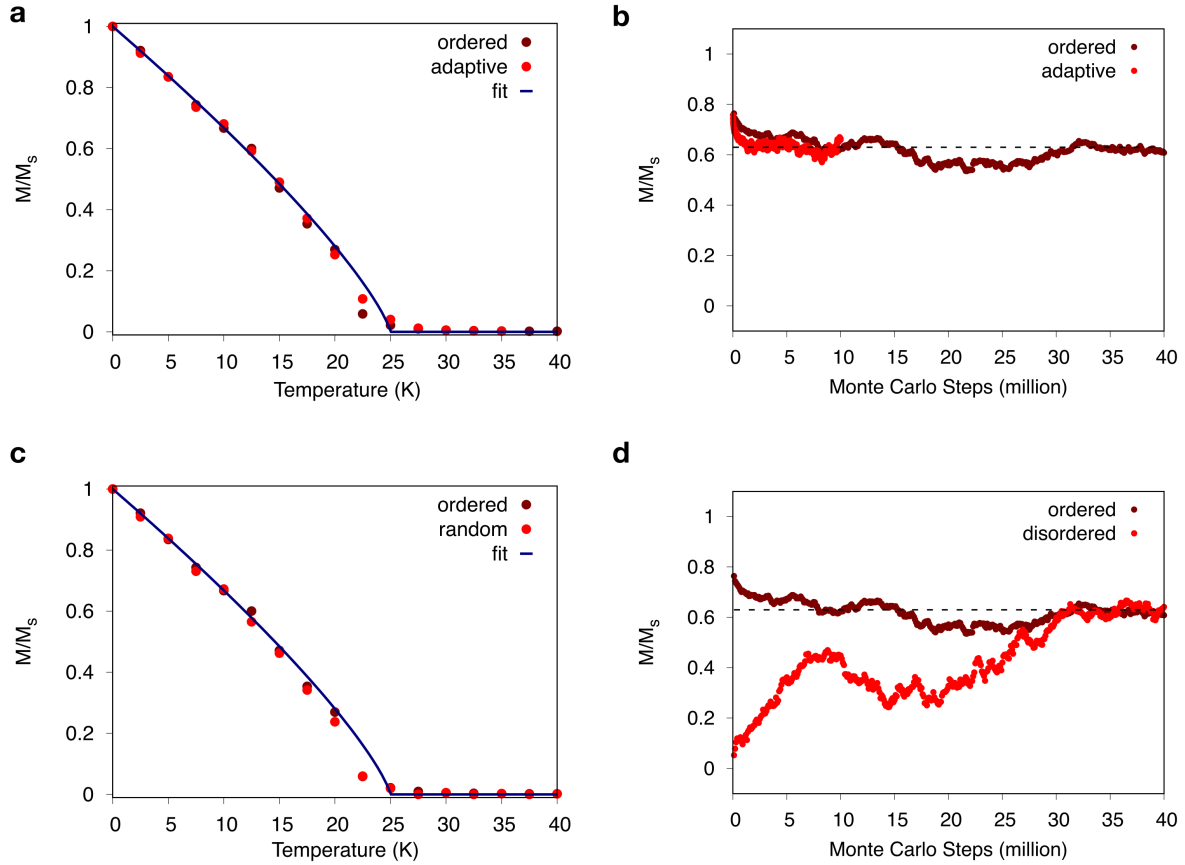

Supplementary Figure 2: **Comparison of different simulation methods.** **a**, Simulated temperature-dependent intrinsic magnetisation using the uniform choice between the trial steps and the adaptive algorithm, respectively. The data show that the equilibrium intrinsic magnetisation at each temperature is the same independent of the algorithm, with the same crossover temperature around  $T_x \sim 23$  K when fitted by Eq. (3) with fitting parameter  $\beta = 0.71$ . **b**, The intrinsic magnetisation at  $T = 10$  K over  $40 \times 10^6$  Monte Carlo steps using the uniform choice between the trial steps and the adaptive algorithm, respectively. Both situations magnetise to approximately  $|m| = 0.64$ , with the adaptive algorithm converging slightly faster. **c**, Comparison between fully ordered and fully random starting configurations for the intrinsic magnetisation. **d**, Convergence of the intrinsic magnetisation to equilibrium for the fully ordered and fully random starting configurations.

62 obtained from the fully ordered starting state.

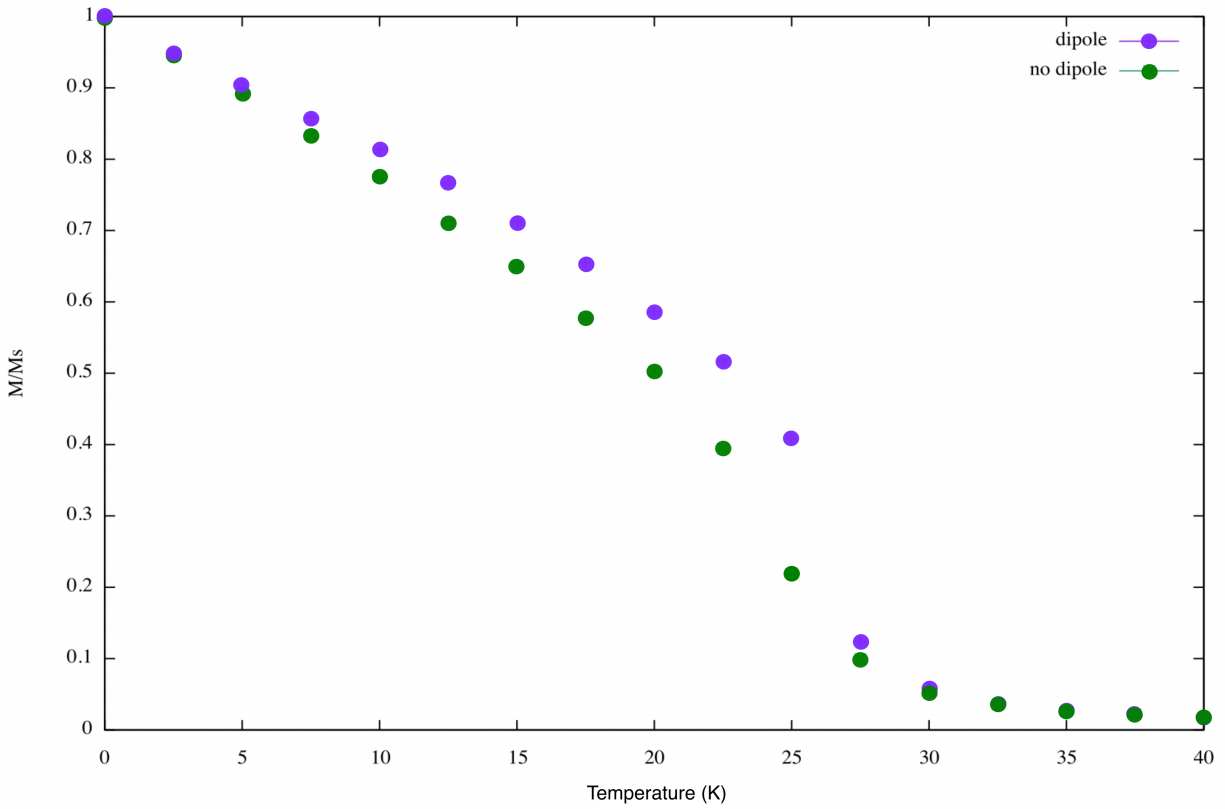

Supplementary Figure 3: **Influence of the dipolar interactions.** Variation of the intrinsic magnetisation  $M/M_S$  for a 2D honeycomb lattice of 50 nm with and without dipole-dipole interactions.

63 **Supplementary Section 5: Angular distribution of the spins**

64 The final spin configurations for the  $1000 \times 1000 \text{ nm}^2$  flake after 40 million Monte Carlo steps for  
65 each size and temperature are shown in Fig. 1. In Supplementary Fig. 4, we plot the distribution of  
66 the angle from the average magnetisation direction of the system over the lattice sites. A deviation  
67 from the sin-like behaviour indicates the presence of short-range order in the system.

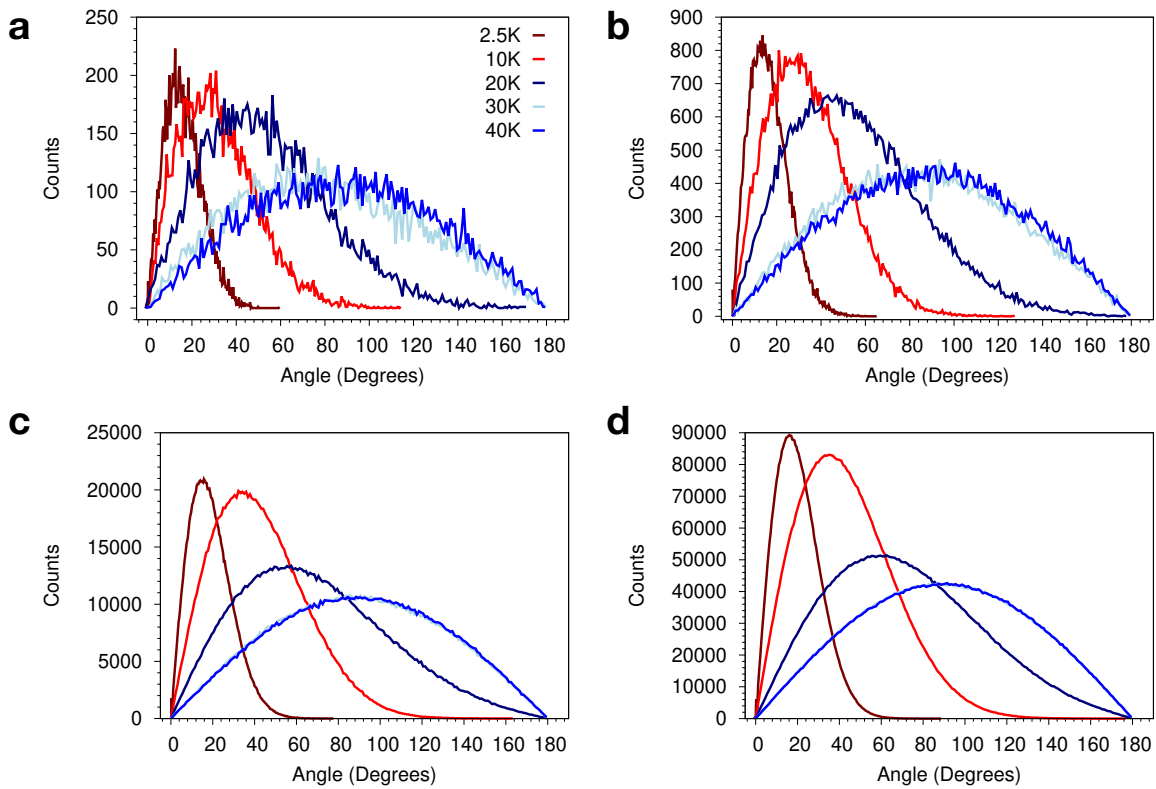

Supplementary Figure 4: **The distribution of the angle measured from the mean magnetisation direction of the system.** **a**, For  $50 \times 50 \text{ nm}^2$ , **b**,  $100 \times 100 \text{ nm}^2$ , **c**,  $500 \times 500 \text{ nm}^2$ , and **d**,  $1000 \times 1000 \text{ nm}^2$  flake sizes. As there is no anisotropy, the average direction is random and can assume any position in space. The small width of the distribution shows that short-range order persists up to 20 K even up to a system size of  $1000 \times 1000 \text{ nm}^2$ .

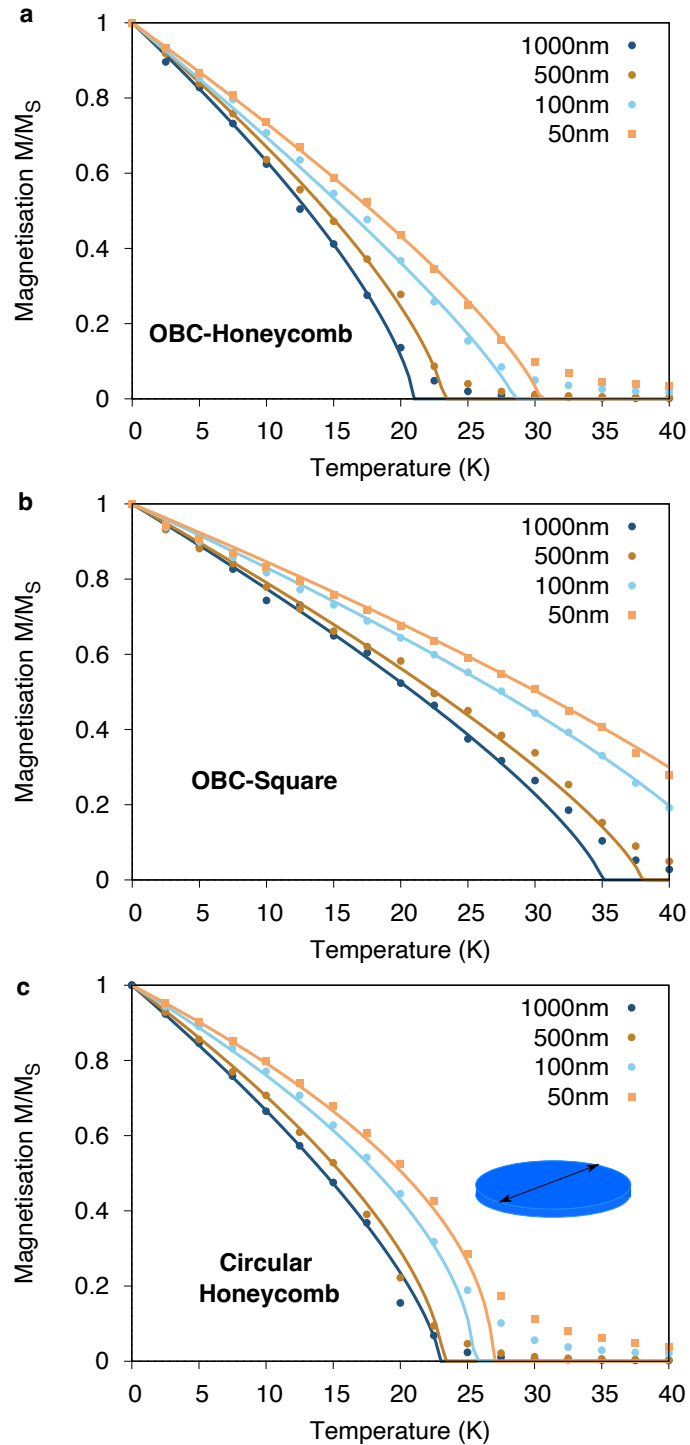

Supplementary Figure 5: **Different boundary conditions and circular flake.** a-c, Open boundary conditions (OBC) applied to honeycomb and square lattices, respectively. Similar approaches and theoretical setup is used for these simulations as in Figure 2. e, Finite circular flake with honeycomb lattice at different diameters showed in the inset. Points are simulated data and solid lines fitting curves to Eq. 3. We noticed the neither the OBCs nor the flake shape change the conclusions.



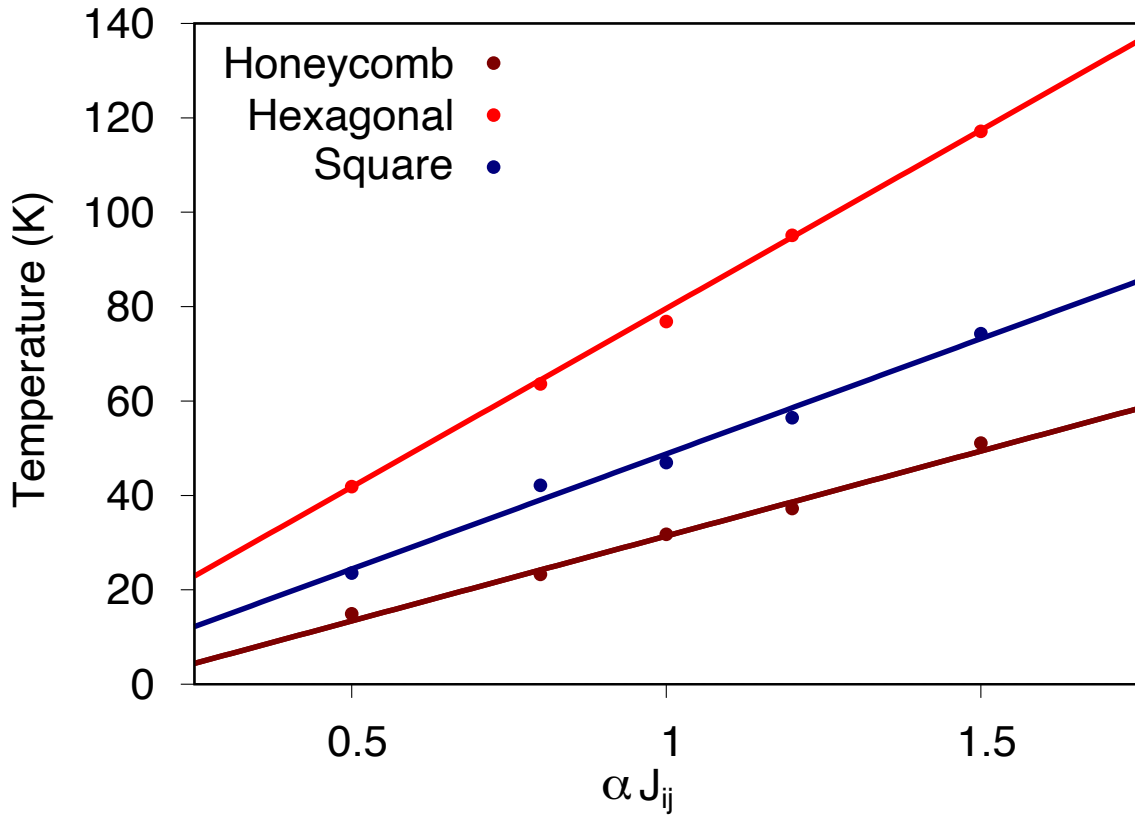

Supplementary Figure 6: **Strength of the exchange interactions.** Calculated crossover temperature (K) versus the exchange interactions  $J_{ij}$  multiplied by the numerical factor  $\alpha$  shown in the x-axis.  $\alpha$  either increased or decreased the magnitudes of  $J_{ij}$  relative to their pristine values (e.g.  $1 \times J_{ij}$ ) taken into account in the computations. A linear variation is observed between the crossover temperatures and  $\alpha J_{ij}$  which indicates that the stabilisation of 2D magnetism is independent of the strength of exchange interactions considered. Similar approaches as those used in Figure 2 are considered with a flake of 100 nm.

## 68 **Supplementary Section 6: Anisotropic spherical model**

69 We use the anisotropic spherical model (ASM) for the calculation of the finite-size and boundary  
70 effects on the intrinsic magnetization<sup>7,8</sup>. Previous works have demonstrated that differently to  
71 spin-wave theory (SWT), the ASM takes into account Goldstone modes in the system and self-  
72 consistently generates a gap in the correlation functions which avoids the infrared divergences.  
73 The Goldstone modes prevent phase transitions for isotropic systems in dimensions  $d \leq 2$ . The  
74 ASM has been used mostly for the analytical study of magnetisation in thin films<sup>9</sup> and domain  
75 walls<sup>7</sup>. So far, comparison of the theory to computational results is restricted to small 3D magnets  
76 of around a few nanometers lateral size in simple cubic lattices<sup>8</sup>, where good agreement has been  
77 found. Here, we adapt the work by Kachkachi and Garanin in Ref. <sup>8</sup> to 1D and 2D systems for the  
78 isotropic Heisenberg Hamiltonian in the absence of an applied magnetic field. We consider a 1D  
79 spin chain, and three different lattices for the 2D systems; cubic, hexagonal and honeycomb.

The average magnetisation is defined as

$$\mathbf{m} = \frac{1}{N} \sum \mathbf{m}_i, \quad (2)$$

which vanishes for finite-size systems in the absence of magnetic field due to the Goldstone mode corresponding to the global rotation of the magnetisation. However, at reduced temperatures the spins in the system are aligned with respect to each other. Thus, a finite intrinsic magnetisation  $M$  exists,

$$M = \sqrt{\left\langle \left( \frac{1}{N} \sum_i \mathbf{S}_i \right)^2 \right\rangle}, \quad (3)$$

80 corresponding to the quantity calculated using Monte Carlo simulations in the main text.

The Hamiltonian is

$$\mathcal{H} = - \sum_{i < j} J_{ij} \mathbf{S}_i \cdot \mathbf{S}_j. \quad (4)$$

81 For the sake of simplicity, we reduce the energy scale to dimensionless variables,  $\lambda_{ij} = J_{ij} / \sum_j J_{ij}$ ,  
 82 and the reduced temperature is defined as  $\theta = T / T_c^{\text{MFA}}$ . For direct comparison to simulations  
 83 using classical spin models, one needs to renormalize  $T_c^{\text{MFA}}$  adequately. In this work we find that  
 84 its value needs to be reduced compared to the analytical expression  $T_c^{\text{MFA}} = \sum_j J_{ij} / 3$  to achieve  
 85 good quantitative agreement with the simulations. In Fig. 2(a)-(c) of the main text, the shaded  
 86 areas denote a range where the rescaling factor is varied between 0.65 and 0.85. We attribute the  
 87 necessity of the rescaling to the fact that the ASM becomes exact as the spin dimension  $D$  becomes  
 88 infinite, while the simulations are carried out for  $D = 3$ .

The anisotropic spherical model consists of self-consistency equations for the magnetization components, which are  $m_i^\alpha = \langle S_i^\alpha \rangle = 0$  ( $\alpha = x, y, z$ ) vanishing in the absence of an applied field, and the Dyson equation for the correlation function  $s_{il} = D \langle S_i^\alpha S_l^\alpha \rangle$ :

$$s_{il} = \theta G_i \delta_{il} + G_i \sum_j \lambda_{ij} s_{jl} \quad (5)$$

where  $\delta_{il}$  is the Kronecker symbol.  $G_i$  is the so-called gap parameter to be determined from the set of constraint equations  $s_{ii} + \mathbf{m}_i^2 = 1$  on all sites  $i = 1, \dots, N$  of the lattice. This reduces to  $s_{ii} = 1$  for zero external field. Solving these equations consists of determining the correlation function  $s_{ij}$  as a function of  $G_i$  from Eq. (5) and using  $s_{ii} = 1$  in order to obtain  $G_i$ . Therefore, the number of parameters in the calculations is  $N^2 + N$ , which can be reduced by taking symmetries into account. For periodic boundary conditions (pbc) with translational symmetry, only the sublattices have to be

treated separately. This allows for an analytical treatment and to study finite-size effects separately from boundary effects. In Fourier space, Eq. (5) simplifies to

$$s_{\mathbf{k},qq'} = \theta \left( \frac{1}{G_q} \delta_{qq'} - \lambda_{\mathbf{k},qq'} \right)^{-1}, \quad (6)$$

where  $q$  and  $q'$  denote sublattice indices. The case of a single sublattice has been treated in Ref. <sup>8</sup>, which is valid for the chain, the square and the hexagonal lattice studied here. However, for the honeycomb lattice two sublattices have to be taken into account. The constraint equations are given by

$$s_{ii} = \frac{1}{\mathcal{N}_c} \sum_{\mathbf{k}} \theta \left( \frac{1}{G_q} \delta_{qq'} - \lambda_{\mathbf{k},qq'} \right)^{-1} \Big|_{q=q'} = 1, \quad (7)$$

<sup>89</sup> where  $\mathcal{N}_c$  is the number of cells, over which the Fourier transformation is performed.

For a single sublattice, one can then calculate the intrinsic magnetization  $M$ :

$$M = \sqrt{1 - \theta G \tilde{P}_N(G)}, \quad (8)$$

with

$$\tilde{P}_N(G) \equiv \frac{1}{N} \sum'_{\mathbf{k}} \frac{1}{1 - G \lambda_{\mathbf{k}}} \quad (9)$$

where the prime indicates that the mode  $\mathbf{k} = 0$  is excluded from the sum. At low temperatures in zero field  $M$  deviates from 1 according to the law

$$M \cong 1 - \theta W_N^{\text{pbc}} / 2 \quad (10)$$

<sup>90</sup> where the coefficient of the term linear in  $\theta$  is smaller than in the bulk. The coefficient  $W_N^{\text{pbc}}$  reads

$$W_N^{\text{pbc}} \equiv \frac{1}{N} \sum'_{\mathbf{k}} \frac{1}{1 - \lambda_{\mathbf{k}}}. \quad (11)$$

91

In particular, in two dimensions one has  $W(\text{pbc}) \cong 8\pi \ln L + \text{const}$ , which results in

$$M \cong 1 - \theta(4\pi \ln L + \text{const}). \quad (12)$$

92

In the following, the geometrical factors  $\lambda_{\mathbf{k}}$  are provided for different lattice structures.

**Chain:** For a one-dimensional system along the  $x$  axis with  $N = L$  spins, the wave vector is defined as

$$k_x = \frac{2\pi n_x}{N}, \quad n_x = 0, \dots, N-1. \quad (13)$$

93

The reduced coupling is  $\lambda_{\mathbf{k}} = \cos(k_x)$ .

In Fig. 4(d) of the main text, the results of the ASM with periodic boundary conditions are compared to the analytical solution of the nearest-neighbour classical Heisenberg model with free boundary conditions<sup>10</sup>. Introducing

$$L(X) = \frac{1}{\tanh(1/X)} - X, \quad (14)$$

where  $X = \frac{2}{3}\theta$ , the intrinsic magnetization is then calculated as

$$M = \frac{1}{N} \sqrt{\frac{N(1+L)}{1-L} - \frac{2L(1-L^N)}{(1-L)^2}}. \quad (15)$$

**Square lattice:** The wave vectors are defined as

$$k_\alpha = \frac{2\pi n_\alpha}{L_\alpha}, \quad n_\alpha = 0, \dots, L_\alpha - 1, \alpha = x, y. \quad (16)$$

94

The reduced couplings  $\lambda_{\mathbf{k}} = \frac{1}{2}(\cos(k_x) + \cos(k_y))$  are used in Eq. (6).

95 **Hexagonal lattice:** The wave vectors are defined as

$$k_x = \frac{2\pi n_x}{L_x}, \quad n_x = 0, \dots, L_x - 1, \quad (17)$$

$$k_y = -\frac{\sqrt{3}}{3} \frac{2\pi n_x}{L_x} + \frac{2\sqrt{3}}{3} \frac{2\pi n_y}{L_y}, \quad n_\alpha = 0, \dots, L_\alpha - 1, \quad \alpha = x, y. \quad (18)$$

The reduced couplings  $\lambda_{\mathbf{k}}$

$$\lambda_{\mathbf{k}} = \frac{1}{2} \left[ \cos(k_x) + 2 \cos\left(\frac{1}{2}k_x\right) \cos\left(\frac{\sqrt{3}}{2}k_y\right) \right] \quad (19)$$

96 are used in Eq. (6).

97 **Honeycomb lattice:** The wave vectors are defined as

$$k_x = \frac{1}{3} \frac{2\pi n_x}{L_x} + \frac{1}{3} \frac{2\pi n_y}{L_y}, \quad n_\alpha = 0, \dots, L_\alpha - 1, \quad \alpha = x, y; \quad (20)$$

$$k_y = \frac{\sqrt{3}}{3} \frac{2\pi n_x}{L_x} - \frac{\sqrt{3}}{3} \frac{2\pi n_y}{L_y}, \quad n_\alpha = 0, \dots, L_\alpha - 1, \quad \alpha = x, y. \quad (21)$$

The reduced couplings  $\lambda_{\mathbf{k}}$  read

$$|\lambda_{\mathbf{k}}| = \frac{1}{3} \sqrt{(\cos(k_x) + 2 \cos(\frac{1}{2}k_x) \cos(\frac{\sqrt{3}}{2}k_y))^2 + (\sin(k_x) - 2 \sin(\frac{1}{2}k_x) \sin(\frac{\sqrt{3}}{2}k_y))^2}, \quad (22)$$

and are only finite between the two sublattices. In Eq. (7) one can use

$$\left( \frac{1}{G_q} \delta_{qq'} - \lambda_{\mathbf{k}, qq'} \right)^{-1} \Big|_{q=q'} = \frac{G}{1 - G^2 |\lambda_{\mathbf{k}}|^2}, \quad (23)$$

where  $G$  is the same for both sublattices. The intrinsic magnetisation of the honeycomb lattice is calculated as

$$M = \sqrt{\frac{\theta G}{N(1 - G)}}, \quad (24)$$

98 where  $N$  is the total number of sites rather than the number of cells. This can be derived from

99 Eq. (3) using the expressions for the correlation function and  $\lambda_{\mathbf{k}=0} = 1$ .

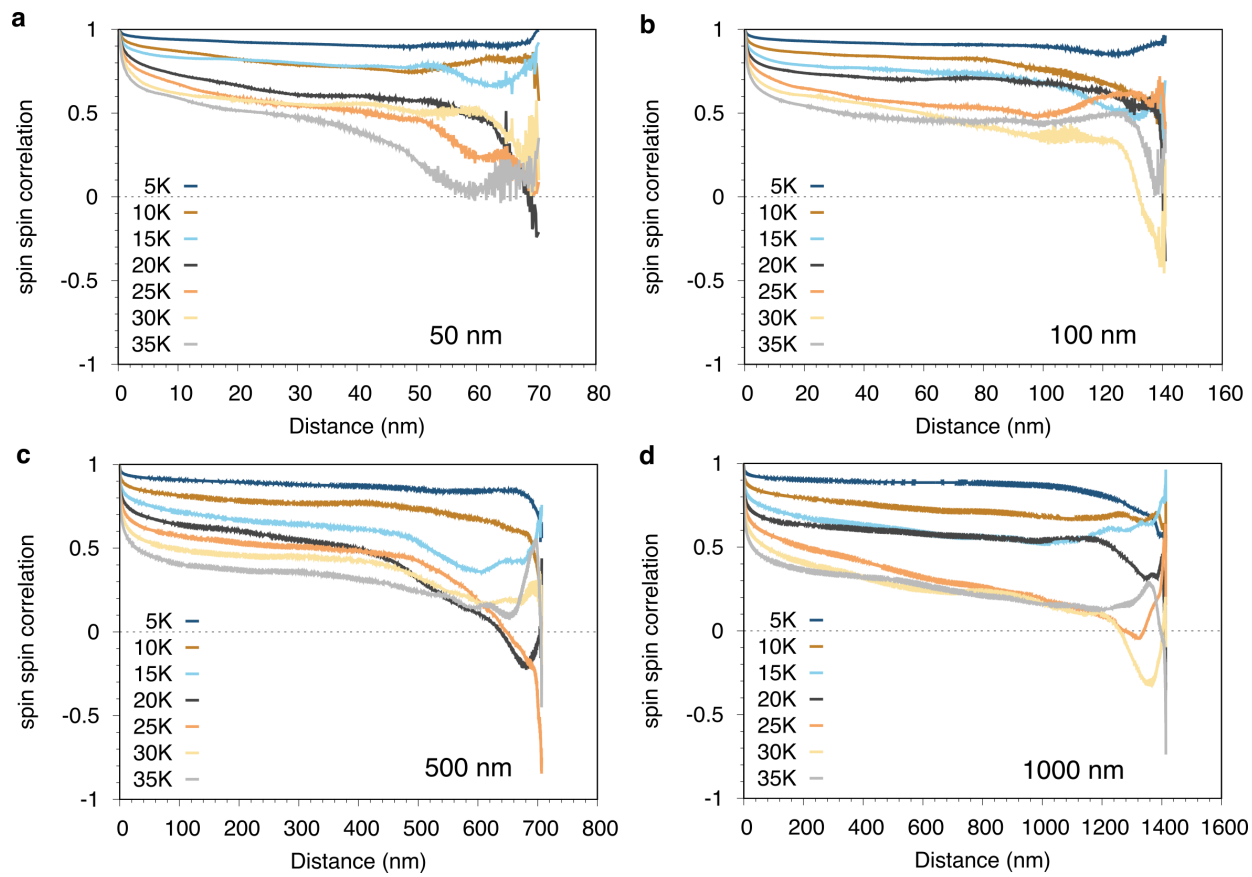

Supplementary Figure 7: **Spin-spin correlation function for a 2D hexagonal lattice.** Spin-spin correlation functions at different temperatures **a**, For  $50 \times 50 \text{ nm}^2$ , **b**,  $100 \times 100 \text{ nm}^2$ , **c**,  $500 \times 500 \text{ nm}^2$ , and **d**,  $1000 \times 1000 \text{ nm}^2$  flake sizes, respectively. Exchange parameters are the same as used in Figure 2.

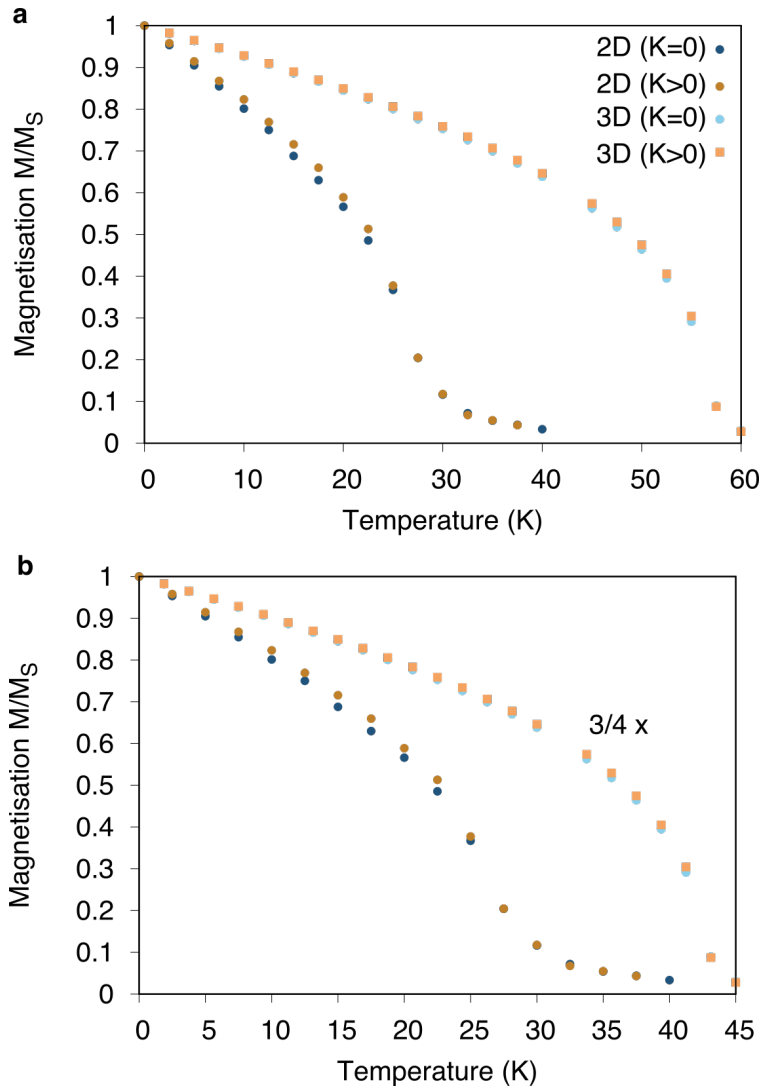

Supplementary Figure 8: **Comparison between 3D and 2D magnetisation for finite systems.** **a**,  $M/M_S$  versus temperature for 2D ( $50 \text{ nm} \times 50 \text{ nm}$ ) and 3D ( $50 \text{ nm} \times 50 \text{ nm} \times 20 \text{ nm}$ ) finite honeycomb systems with ( $K = 1 \times 10^{-24} \text{ J/atom}$ ) and without magnetic anisotropy ( $K = 0$ ). **b**, Similar as **a**, but with the temperature in the 3D case scaled by a  $3/4$  factor to remove the effect of an additional interlayer exchange interaction taken into account. That is, if the dimensionality would be a scaling factor on the crossover temperature, both  $M(T)$  curves for 2D and 3D systems would be close or superposed to each other. However, we found that the finite volume liaised with the exchange interactions play together to stabilise higher crossover temperatures and a different shape of the  $M(T)$  between 2D and 3D systems. Indeed, we cannot separate contributions from exchange interactions and volume in a simply way which indicates that strictly 2D magnetic order is different to that at bulk compounds. Similar methods as those for Figure 1 are used.



100 **Supplementary References**

- 102 1. Metropolis, N., Rosenbluth, A. W., Rosenbluth, M. N., Teller, A. H. & Teller, E. Equation of  
103 state calculations by fast computing machines. *Journal of Chemical Physics* **21**, 1087–1092  
104 (1953).
- 105 2. Nowak, U. & Hinzke, D. Magnetization switching in small ferromagnetic particles: Nu-  
106 cleation and coherent rotation. *Journal of Applied Physics* **85**, 4337–4339 (1999). URL  
107 <https://doi.org/10.1063/1.370360>. <https://doi.org/10.1063/1.370360>.
- 108 3. Evans, R. F. *et al.* Atomistic spin model simulations of magnetic nanomaterials. *Journal of*  
109 *Physics Condensed Matter* **26** (2014).
- 110 4. Kartsev, A., Augustin, M., Evans, R. F. L., Novoselov, K. S. & Santos, E. J. G. Biquadratic  
111 exchange interactions in two-dimensional magnets. *npj Comput. Mater.* **6**, 150 (2020). URL  
112 <https://doi.org/10.1038/s41524-020-00416-1>.
- 113 5. Nowak, U., Chantrell, R. W. & Kennedy, E. C. Monte Carlo simulation with time step  
114 quantification in terms of Langevin dynamics. *Phys. Rev. Lett.* **84**, 163–166 (2000). URL  
115 <https://link.aps.org/doi/10.1103/PhysRevLett.84.163>.
- 116 6. Alzate-Cardona, J. D., Sabogal-Suárez, D., Evans, R. F. L. & Restrepo-Parra, E. Optimal phase  
117 space sampling for Monte Carlo simulations of Heisenberg spin systems. *Journal of Physics:*  
118 *Condensed Matter* **31**, 095802 (2019). URL [https://doi.org/10.1088%2F1361-648x%](https://doi.org/10.1088%2F1361-648x%2Faaf852)  
119 [2Faaf852](https://doi.org/10.1088%2F1361-648x%2Faaf852).

- 120 7. Garanin, D. A. Spherical model for anisotropic ferromagnetic films. *Journal of Physics A:*  
121 *Mathematical and General* **29**, L257–L262 (1996). URL [http://dx.doi.org/10.1088/](http://dx.doi.org/10.1088/0305-4470/29/10/006)  
122 0305-4470/29/10/006.
- 123 8. Kachkachi, H. & Garanin, D. A. Boundary and finite-size effects in small magnetic systems.  
124 *Physica A: Statistical Mechanics and its Applications* **300**, 487–504 (2001). URL [https://](https://www.sciencedirect.com/science/article/pii/S0378437101003612)  
125 [www.sciencedirect.com/science/article/pii/S0378437101003612](https://www.sciencedirect.com/science/article/pii/S0378437101003612).
- 126 9. Garanin, D. A. Ordering in magnetic films with surface anisotropy. *Journal of Physics A:*  
127 *Mathematical and General* **32**, 4323–4342 (1999). URL [http://dx.doi.org/10.1088/](http://dx.doi.org/10.1088/0305-4470/32/24/301)  
128 0305-4470/32/24/301.
- 129 10. Fisher, M. E. Magnetism in one-dimensional systems the heisenberg model for infinite spin.  
130 *American Journal of Physics* **32**, 343–346 (1964). URL [https://doi.org/10.1119/1.](https://doi.org/10.1119/1.1970340)  
131 1970340. <https://doi.org/10.1119/1.1970340>.
